# Supplementary material for: NIR Imaging of the Integrin-Rich Head and Neck Squamous Cell Carcinoma Using Ternary Copper Indium Selenide/Zinc Sulfide-Based Quantum Dots
Source: PubMed Central journal article supplement (PMC7764319; doi:10.3390/cancers12123727), 2020-12-11
Supplement: cancers-12-03727-s001.pdf [file cancers-12-03727-s001.pdf]

# NIR imaging of the integrin-rich head and neck squamous cell carcinoma using ternary copper indium sulfide-based quantum dots

Ilya Yakavets <sup>1</sup>, Aurelie Francois <sup>1</sup>, Maelle Guiot <sup>1</sup>, Nicolas Lequeux <sup>2</sup>, Alexandra Fragola <sup>2</sup>, Thomas Pons <sup>2,\*</sup>, Lina Bezdetsnaya <sup>1,\*</sup> and Frédéric Marchal <sup>1,3</sup>

<sup>1</sup> Université de Lorraine, CNRS UMR7039 CRAN, Institut de Cancérologie de Lorraine, 6 avenue de Bourgogne, 54519 Vandœuvre-lès-Nancy, France;

<sup>2</sup> Laboratoire de Physique et d'Étude des matériaux (LPEM, UMR 8213), ESPCI Paris, PSL University, CNRS, Sorbonne University, 10, rue Vauquelin, 75005 Paris, France;

<sup>2</sup> Surgical Department, Institut de Cancérologie de Lorraine, 6 avenue de Bourgogne, 54519 Vandœuvre-lès-Nancy, France

## Supporting Material

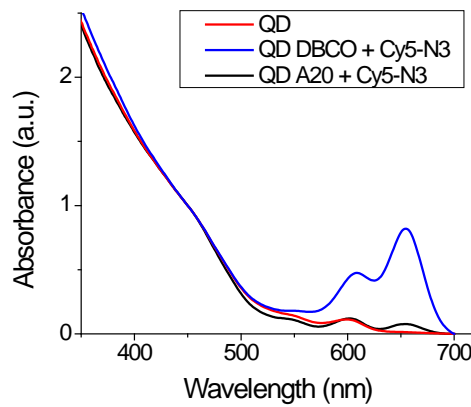

**Figure S1.** Colorimetric assay of the efficiency of the conjugation of the N<sub>3</sub>-A20 peptide to the accessible reactive moieties. Red: Absorption spectra of visible emitting QDs before functionalization. The numbers of reactive DBCO groups available for reaction on QD-DBCO and remaining on QD-A20 after reaction with the N<sub>3</sub>-A20 peptide were evaluated by reaction with excess N<sub>3</sub>-modified Cy5 dyes. After the reaction between the DBCO groups and the N<sub>3</sub>-dyes, the QDs were purified by several rounds of ultrafiltration. The comparison between the blue spectrum (QD-DBCO + N<sub>3</sub>-Cy5) and the black spectrum (QD-A20 + N<sub>3</sub>-Cy5) shows that the modification of DBCO groups with the peptide occurs with a >90 % efficiency.

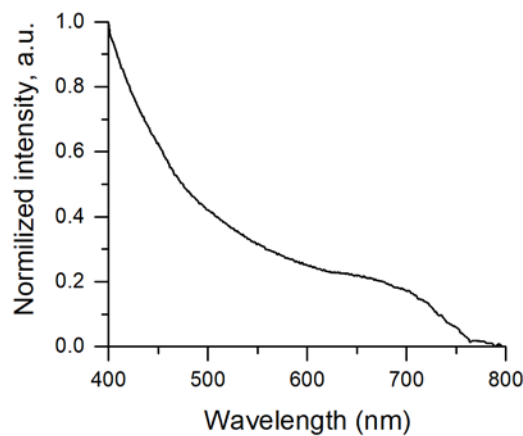

**Figure S2.** Photoluminescence excitation spectrum from the NIR QDs (detection at 750 nm).

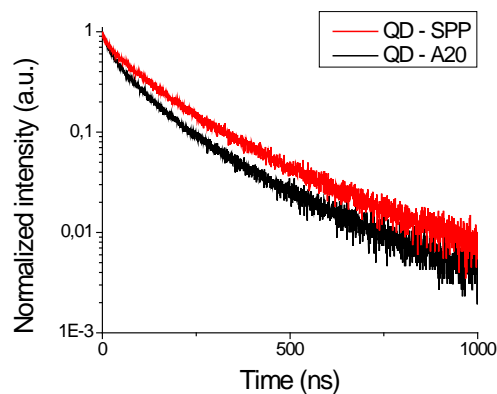

**Figure S3.** Fluorescence decay of QD before (red) and after (black) functionalization with DBCO and A20 peptides.

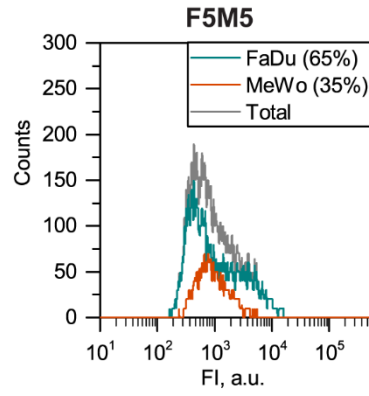

**Figure S4.** Flow cytometry histograms of FaDu (cyan) and MeWo (orange) cells from co-culture (F5M5) spheroids exposed for 3h to 50 nM A20-QDs.

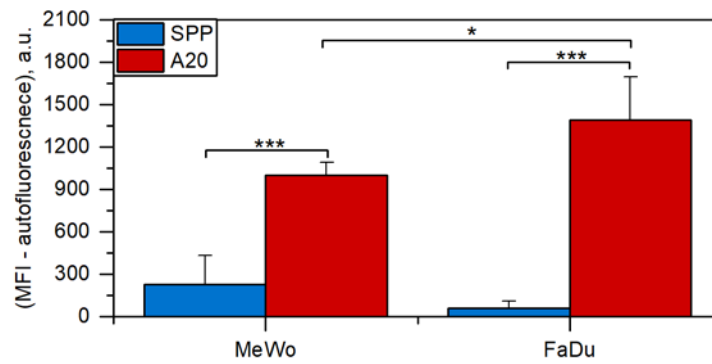

**Figure S5.** The adjusted MFI values (autofluorescence subtracted) of FaDu and MeWo cells from co-culture (F5M5) spheroids exposed for 3h to 50 nM of SPP-QDs (blue) and A20-QDs (red). Data represent mean  $\pm$  SD [n = 4-6; \* $p$  < 0.05; \*\*\* $p$  < 0.001, using ANOVA].

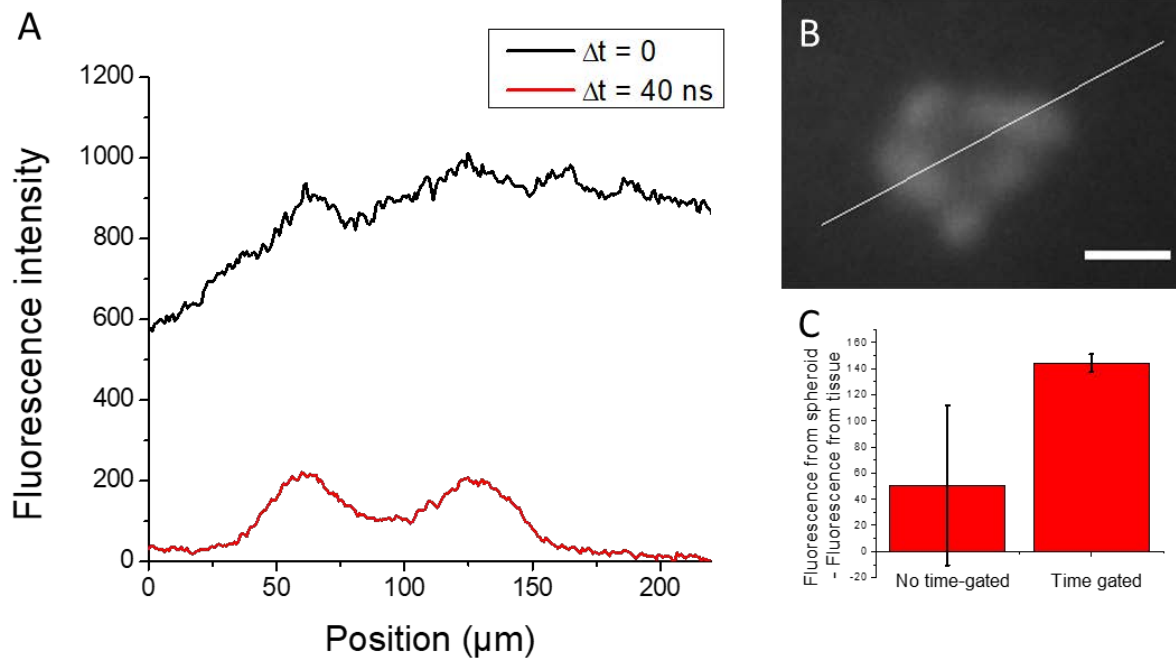

**Figure S6.** Quantitative analysis of fluorescence images captured with and without time-gated detection. (a) Fluorescence intensity along a line profile (shown in (b)) going through the spheroid without time-gated detection ( $\Delta t = 0$ , black) and with time-gated detection ( $\Delta t = 40$  ns, red). (c) Comparison of the difference in average fluorescence intensity in the spheroid region and from the tissue outside of the spheroid without and with time-gated detection. The scale bar represents the standard deviation from the intensity pixel values from the tissue background.
